# Supplementary material
Source: Springer Nature journal article supplement (https://www.springermedizin.de/resource/supplementary/12871_2014_316_MOESM6_ESM.pdf/9429076)
Supplement: MOESM6 [file 9429076]

**A****ProADM**

Pre-analytic factor

Change % (95% CI), p value

Antibiotic pretreatment

-5.4 (-8.6, -2.2), &lt;0.01

Steroid pretreatment

1.8 (-7.4, 11.1), 0.70

Age above median

13.2 (10.2, 16.1), &lt;0.01

Male gender

-8.8 (-11.6, -5.9), &lt;0.01

Chronic renal failure

10.8 (6.6, 14.8), &lt;0.01

Chronic liver insufficiency

10.4 (0.5, 20.2), 0.04

-20

-10

0

10

20

Change (%)

— 95% CI ■ mean

**B****Copeptin**

Pre-analytic factor

Change % (95% CI), p value

Antibiotic pretreatment

-2.9 (-6.4, 0.5), 0.10

Steroid pretreatment

2.1 (-7.9, 12.1), 0.68

Age above median

12.1 (8.9, 15.4), &lt;0.01

Male gender

0.1 (-3.1, 3.3), 0.96

Chronic renal failure

6.3 (1.8, 10.9), 0.01

Chronic liver insufficiency

7.5 (-3.2, 18.1), 0.17

-20

-10

0

10

20

Change (%)

— 95% CI ■ mean
